# Supplementary material for: Synthesis and structural characterisation of luminescent di- and tri-nuclear palladium(II) acetylide complexes as building blocks for metallodendrimers†
Source: Royal Society of Chemistry journal article supplement (doi:10.1039/b009894i), 2001-01-01
Supplement: b009894i.doc [file b009894i.doc]

Synthesis and structural characterization of luminescent di- and trinuclear palladium(II) acetylide complexes as building blocks for metallodendrimers

# Vivian Wing-Wah Yam*, Lingjun Zhang, Chi-Hang Tao, Keith Man-Chung Wong, and Kung-Kai Cheung

# Department of Chemistry, The University of Hong Kong, Pokfulam Road, Hong Kong, P. R. China

### Supplementary Information

**Crystal Structure Determination.** Crystals of **1** were obtained by recrystallisation from benzene-*n*-pentane. *Crystal Data.*: [C48H93P6Cl3Pd3], M = 1281.66, monoclinic, space group *C*2/*c* (No. 15), *a* = 11.233(7) Å, *b* = 31.389(6) Å, *c* = 19.214(4) Å, ** = 103.60(3)o, *V* = 6584(4) Å3, *Z* = 4, *Dc* = 1.293 g cm3, **(Mo-K**) = 11.05 cm1, *F*(000) = 2640, T = 301 K. A colourless crystal of dimensions 0.35  0.15  0.10 mm mounted on a glass fibre was used for data collection at 28oC on a Rigaku AFC7R diffractometer with graphite monochromatized Mo-K** radiation (** = 0.71073 Å) using **2** scans with **-scan angle (0.73 + 0.35 tan **)o at a scan speed of 16.0 deg min1 (up to 6 scans for reflection with *I* < 15**(*I*)). Unit-cell dimensions were determined based on the setting angles of 25 reflections in the 2** range of 20.2 to 25.1°. Intensity data (in the range of 2** max = 50°; *h*: 0 to 12; *k*: 0 to 37; *l*: 22 to 22 and 3 standard reflections measured after every 300 reflections showed decay of 4.49%) were corrected for decay and Lorentz and polarisation effects, and empirical absorption corrections based on the **-scan of five strong reflections (minimum and maximum transmission factors 0.576 and 1.000). 5574 reflections were measured, of which 5249 were unique and *R*int = 0.036. 2201 reflections with *I* > 3**(*I*) were considered observed and used in the structural analysis. The space group was determined based on a statistical analysis of intensity distribution and the successful refinement of the structure solved by direct methods (*SIR92*[[1]](#endnote-2)) and expanded by Fourier method and refined by full-matrix least-squares using the software package *TeXsan*[[2]](#endnote-3) on a Silicon Graphics Indy computer. One crystallographic asymmetric unit consists of half of one formula unit with Pd(1), Cl(1), C(1), C(2), C(3) and C(6) at special positions. In the least-squares refinement, the Pd, Cl and P atoms were refined anisotropically, all 26 C atoms were refined isotropically and 47 H atoms at calculated positions with thermal parameters equal to 1.3 times that of the attached C atoms were not refined. Convergence for 152 variable parameters by least-squares refinement on *F* with *w* = 4*F*o2/**2(*F*o2), where **2(*F*o2) = [**2(*I*) + (0.040 Fo2)2] for 2201 reflections with *I* > 3**(*I*) was reached at *R* = 0.060 and *wR* = 0.088 with a goodness-of-fit of 2.50. (**/**)max = 0.05 except for the H atoms. The final difference Fourier map was featureless, with maximum positive and negative peaks of 0.84 and 0.53 eÅ3 respectively.

Crystals of **2** were obtained by recrystallisation from benzene-*n*-pentane. *Crystal Data.*: [C45H84SiP4Cl2Pd2], M = 1060.85, monoclinic, space group *P*21/*n* (No. 14), *a* = 12.786(2) Å, *b* = 15.416(3) Å, *c* = 29.024(3) Å, ** = 94.63(2)o, *V* = 5702(1) Å3, *Z* = 4, *Dc* = 1.236 g cm3, **(Mo-K**) = 8.84 cm1, *F*(000) = 2216, T = 301 K. A colourless crystal of dimensions 0.4  0.1  0.1 mm mounted on a glass fibre was used for data collection at 28oC on a MAR diffractometer with a 300 mm image plate detector using graphite monochromatized Mo-K** radiation (** = 0.71073 Å). Data collections were made with 2o oscillation (96 images) at 120 mm distance and 600 s exposure. The images were interpreted and intensities integrated using program *DENZO*.[[3]](#endnote-4) 7882 unique reflections were obtained from a total of 45846 measured reflections (Rint = 0.062). 3158 reflections with *I* > 3**(*I*) were considered observed and used in the structural analysis. These reflections were in the range of *h*: 0 to 15; *k*: 0 to 17; *l*: 34 to 33 with 2**max = 50.8o. The space group was determined based on systematic absences and the structure was solved by Patterson methods and expanded by Fourier methods (*PATTY*[[4]](#endnote-5)) and refinement by full-matrix least-squares using the software package *TeXsanError: Reference source not found* on a Silicon Graphics Indy computer. A crystallographic asymmetric unit consists of one molecule. In the least-squares refinement, 9 non-H atoms were refined anisotropically, all 45 C atoms were refined isotropically, and 84 H atoms at calculated position with thermal parameters equal to 1.3 times that of the attached C atoms were not refined. Convergence for 262 variable parameters by least-squares refinement on *F* with *w* = 4*Fo2*/*2(Fo2)*, where **2(*Fo2*) = [**2(*I*) + (0.050*Fo*2)2] for 3158 reflections with *I* > 3**(*I*) was reached at *R* = 0.095 and *wR* = 0.137 with a goodness of fit of 3.71. (**/**)max = 0.05 for atoms refined anisotropically. The final difference Fourier map was featureless, with maximum positive and negative peaks of 1.26 and 0.74 eÅ3 respectively.

1. . A. Altomare, M. Cascarano, C. Giacovazzo, A. Guagliardi, M. C. Burla, G. Polidori and M. Camalli, *J. Appl. Cryst.*, 1994, **27**, 435. [↑](#endnote-ref-2)
2. . *TeXsan*: Crystal Structure Analysis Package, Molecular Structure Corporation, 1985 and 1992, the Woodlands, Texas, U.S.A. [↑](#endnote-ref-3)
3. . In “The HKL manual – A description of programs *DENZO*, *XDISPLAYF*, and *SCALEPACK*” written by D. Gewirth, with the co-operation of the program authors Z. Otwinowski and W. Minor (1995), Yale University, New Haven, U.S.A. [↑](#endnote-ref-4)
4. . P. T. Beurskens, G. Admiraal, G. Beurskens, W. P. Bosman, S. Garcia-Granda, R. O. Gould, J. M. M. Smits and C. Smykalla, 1992, The *DIRDIF* program system, Technical Report of the Crystallography Laboratory, University of Nijimegen, The Netherlands. [↑](#endnote-ref-5)
